# Supplementary material for: Syntheses, structures, magnetism and electrocatalytic oxygen evolution for four cobalt, manganese and copper complexes with dinuclear, 1D and 3D structures
Source: Royal Society of Chemistry journal article supplement (doi:10.1039/c9dt00227h), 2019-01-01
Supplement: c9dt00227h1.pdf [file c9dt00227h1.pdf]

## Supporting Information

### Syntheses, Structures, Magnetism and Electrocatalytic Oxygen Evolution for Four Cobalt, Manganese and Copper Complexes with Dinuclear, 1D and 3D Structures

Li Zhong, Shang-Fang Xie, Jian-Qiang He, Qi-Sui Zhong, Meng Yang, Wen-Bin Chen\*  
and Wen Dong\*

Guangzhou Key Laboratory for Environmentally Functional Materials and Technology, School of  
Chemistry and Chemical Engineering, Guangzhou University, Guangzhou 510006, P. R.China.

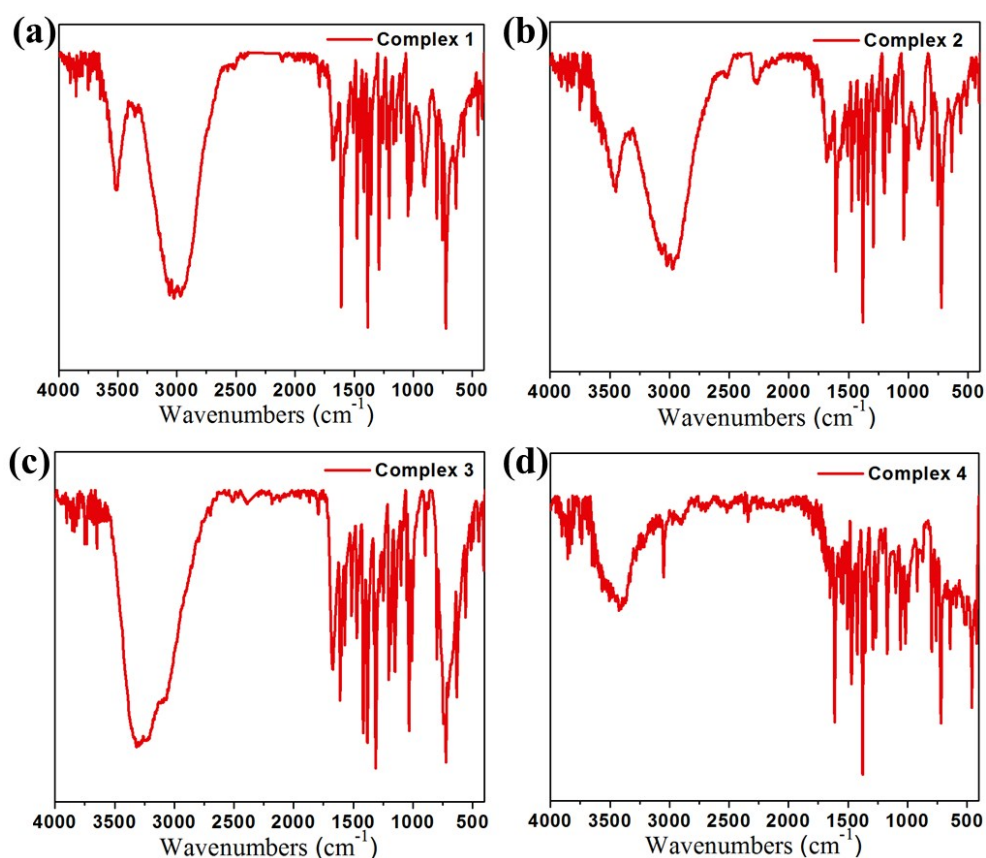

Fig. S1 IR spectra plots of complexes 1-4.

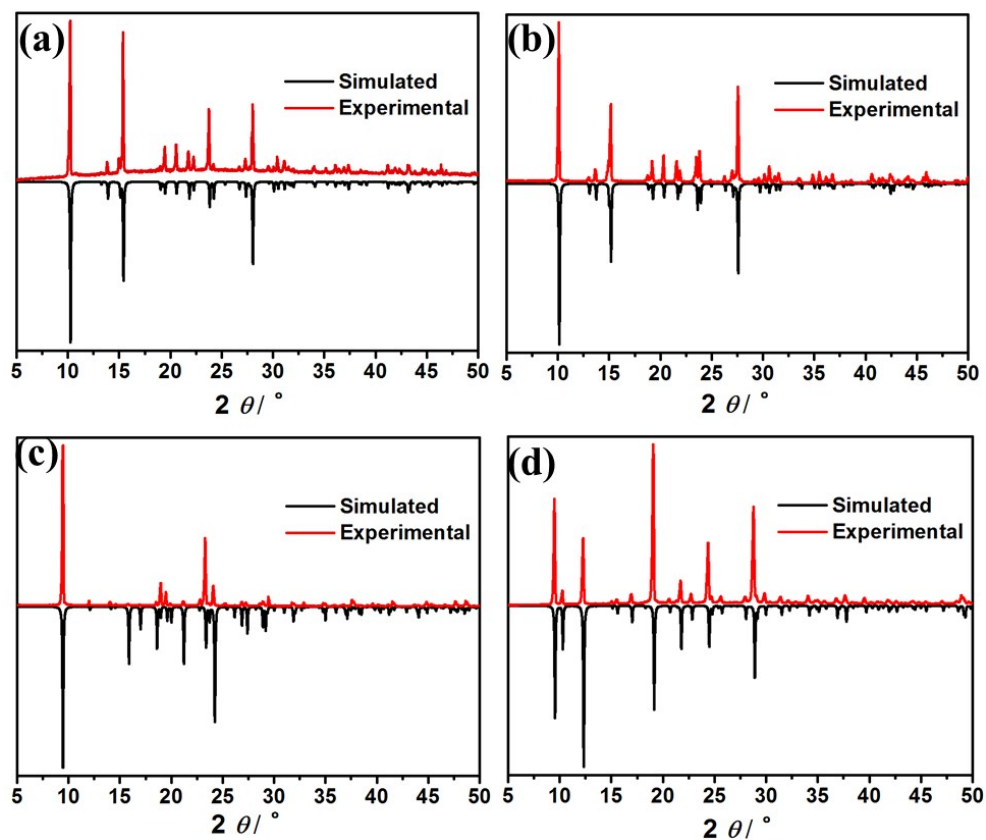

Fig. S2 Powder X-ray diffraction (PXRD) patterns for complexes **1-4**.

Table S1 Selected bond distances (Å) and angles (°) for **1** and **2**.

| <b>1</b>    |            | <b>2</b>   |            |
|-------------|------------|------------|------------|
| Mn1-O2      | 2.267(3)   | Co1-O1     | 2.116(2)   |
| Mn1-O1      | 2.190(3)   | Co1-O2     | 2.172(2)   |
| Mn1-N1      | 2.305(2)   | Co1-N1     | 2.1954(17) |
| Mn1-N3A     | 2.233(2)   | Co1-N2     | 2.0477(18) |
| Mn1-N5A     | 2.270(2)   | Co1-N3A    | 2.0994(17) |
| Mn1-N2      | 2.181(2)   | Co1-N5A    | 2.1767(18) |
| N3-Mn1A     | 2.233(2)   | Co1A-N3    | 2.0995(17) |
| N5-Mn1A     | 2.270(2)   | Co1A-N5    | 2.1766(18) |
| O2-Mn1-N1   | 88.41(11)  | O1-Co1-O2  | 171.37(8)  |
| O2-Mn1-N5A  | 88.50(10)  | O1-Co1-N1  | 89.02(8)   |
| O1-Mn1-O2   | 173.72(10) | O1-Co1-N5A | 87.42(8)   |
| O1-Mn1-N1   | 90.40(12)  | O2-Co1-N1  | 86.99(8)   |
| O1-Mn1-N3A  | 91.63(11)  | O2-Co1-N5A | 87.65(7)   |
| O1-Mn1-N5A  | 87.17(10)  | N2-Co1-O1  | 95.34(8)   |
| N3A-Mn1-O2  | 91.48(11)  | N2-Co1-O2  | 91.08(8)   |
| N3A-Mn1-N1  | 161.17(9)  | N2-Co1-N1  | 75.68(7)   |
| N3A-Mn1-N5A | 73.31(9)   | N2-Co1-N3A | 91.29(7)   |
| N5A-Mn1-N1  | 125.50(9)  | N2-Co1-N5A | 166.59(7)  |

|                               |           |             |           |
|-------------------------------|-----------|-------------|-----------|
| N2-Mn1-O2                     | 89.07(10) | N3A-Co1-O1  | 92.10(9)  |
| N2-Mn1-O1                     | 96.47(11) | N3A-Co1-O2  | 93.51(8)  |
| N2-Mn1-N1                     | 72.87(8)  | N3A-Co1-N1  | 166.98(6) |
| N2-Mn1-N3A                    | 88.31(9)  | N3A-Co1-N5A | 75.47(7)  |
| N2-Mn1-N5A                    | 161.38(9) | N5A-Co1-N1  | 117.55(7) |
| Symmetry code: A= -x, 1-y, z. |           |             |           |

Table S2 Selected bond distances (Å) and angles (°) for **3** and **4**.

| <b>3</b>                            |            | <b>4</b>                                              |            |
|-------------------------------------|------------|-------------------------------------------------------|------------|
| Mn1 -O1                             | 2.2555(16) | Cu1-N1                                                | 2.060(3)   |
| Mn1 -O2                             | 2.1389(16) | Cu1-N2                                                | 1.932(4)   |
| Mn1 -N1                             | 2.3375(19) | Cu1-N3A                                               | 1.967(3)   |
| Mn1-N2                              | 2.1751(18) | Cu1-N5A                                               | 2.008(4)   |
| Mn1-N3A                             | 2.2624(18) | Cu1-N7B                                               | 2.217(4)   |
| Mn1-N5A                             | 2.3067(18) | N1-Cu1-N7B                                            | 90.51(13)  |
| O1-Mn1-N1                           | 84.13(6)   | N2-Cu1-N1                                             | 78.82(14)  |
| O1-Mn1-N3A                          | 153.44(6)  | N2-Cu1-N3A                                            | 91.43(14)  |
| O1-Mn1- N5A                         | 82.82(6)   | N2-Cu1-N5A                                            | 165.16(15) |
| O2-Mn1-O1                           | 87.71(6)   | N2-Cu1-N7B                                            | 92.93(15)  |
| O2-Mn1-N1                           | 85.98(6)   | N3A-Cu1-N1                                            | 164.61(15) |
| O2-Mn1-N2                           | 159.26(7)  | N3A-Cu1-N5A                                           | 78.41(14)  |
| O2-Mn1-N3A                          | 84.70(6)   | N3A-Cu1-N7B                                           | 101.96(15) |
| O2-Mn1-N5A                          | 100.12(6)  | N5A-Cu1-N1                                            | 108.62(14) |
| N2-Mn1-O1                           | 93.56(6)   | N5A-Cu1-N7B                                           | 99.71(16)  |
| N2-Mn1-N1                           | 73.59(6)   | Symmetry code: A= x, y, 1-z; B = 3/2-x, 3/2+y, 5/4+z. |            |
| N2-Mn1-N3A                          | 102.44(6)  |                                                       |            |
| N2-Mn1-N5A                          | 100.57(7)  |                                                       |            |
| N3A-Mn1-N1                          | 120.55(6)  |                                                       |            |
| N3A-Mn1-N5A                         | 73.57(6)   |                                                       |            |
| N5A-Mn1-N1                          | 165.33(7)  |                                                       |            |
| Symmetry code: A= 1-x, 1-y, -1/2+z. |            |                                                       |            |

Table S3. Information of hydrogen bonds in complex **1**.

| Hydrogen Bond | Bond Distances (Å) | Bond Angles (°) | Symmetry of the acceptor |
|---------------|--------------------|-----------------|--------------------------|
| O1—H1A...N4   | 2.7439(24)         | 169             | 1/4-x, 1/4+y, 1/4+z      |
| O1—H1B...O2   | 2.9810(27)         | 142             | 1/2-x, 1-y, 1/2+z        |
| O2—H2A...N7   | 2.7484(25)         | 177             | -1/4-x, 1/4+y, -1/4+z    |
| O2—H2B...N8   | 2.8275(24)         | 173             | 1/4+x, 3/4-y, -1/4+z     |

Table S4. Information of hydrogen bonds in complex **2**.

| Hydrogen Bond | Bond Distances (Å) | Bond Angles (°) | Symmetry of the acceptor |
|---------------|--------------------|-----------------|--------------------------|
| O1—H1A...N4   | 2.7556(33)         | 168             | 3/4-x, 1/4+y, -1/4+z     |
| O1—H1B...O2   | 2.8684(33)         | 141             | 1/2-x, 1-y, -1/2+z       |
| O2—H2A...N7   | 2.7669(33)         | 178             | 5/4-x, 1/4+y, 1/4+z      |
| O2—H2B...N8   | 2.8059(32)         | 175             | -1/4+x, 3/4-y, 1/4+z     |

Table S5. Information of hydrogen bonds in complex **3**.

| Hydrogen Bond | Bond Distances (Å) | Bond Angles (°) | Symmetry of the acceptor |
|---------------|--------------------|-----------------|--------------------------|
| O1—H1A...N7   | 2.8627(25)         | 172             | 1/2+x, 3/2-y, -1+z       |
| O1—H1B...N4   | 2.9273(24)         | 138             | 1/2+x, 3/2-y, z          |
| O2—H2A...N8   | 2.7606(24)         | 148             | 1/2+x, 3/2-y, -1+z       |
| O2—H2B...N6   | 2.8298(26)         | 143             | 1-x, 1-y, -3/2+z         |

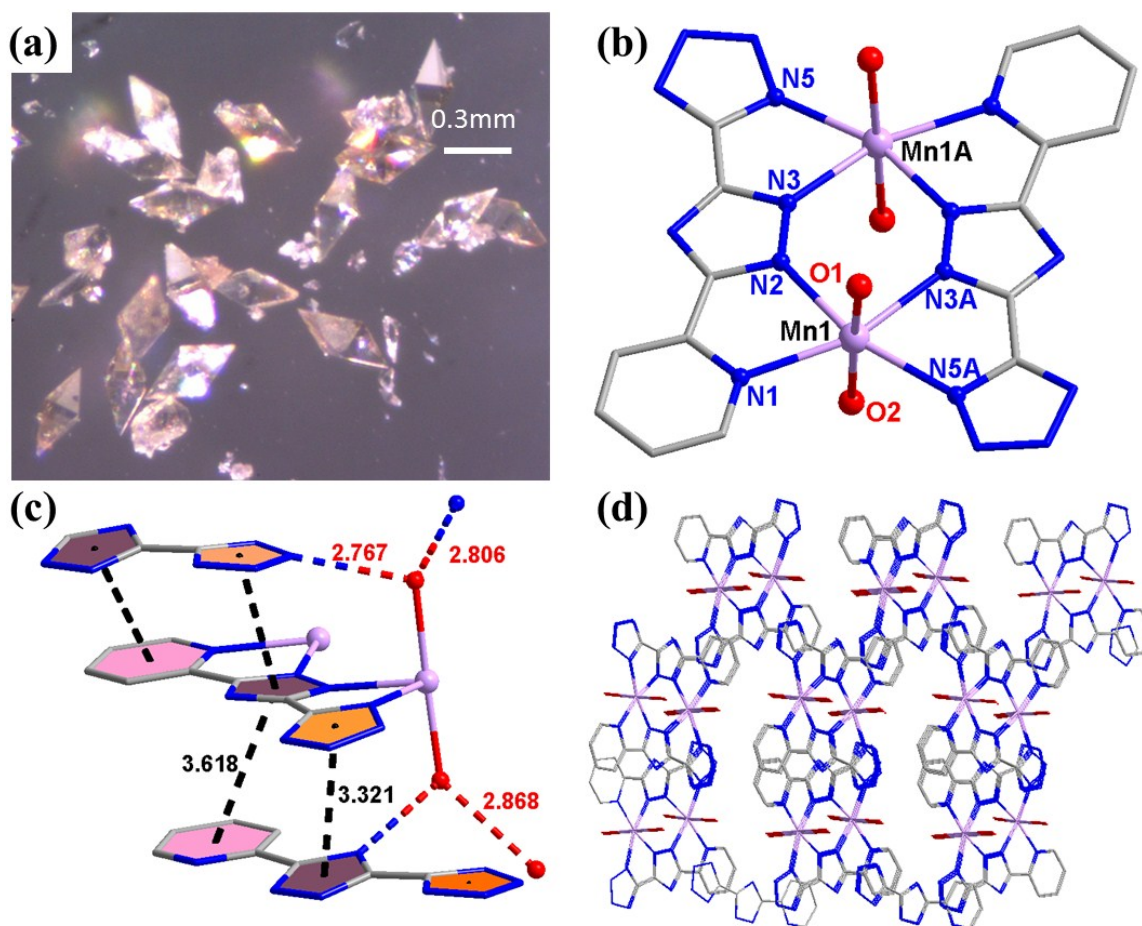

Fig. S3. (a) Photograph of single crystal of complex **2**. (b) Molecular structure of complex **2**, hydrogen atoms are omitted for clarity. Symmetry code: A= -x, 1-y, z. (c) O-H...O and O-H...N hydrogen bonds and  $\pi$ - $\pi$  stacking interactions. (d) 3D supramolecular structure of **2**. Color code: Mn, bright blue; N, blue; O, red; C, gray.

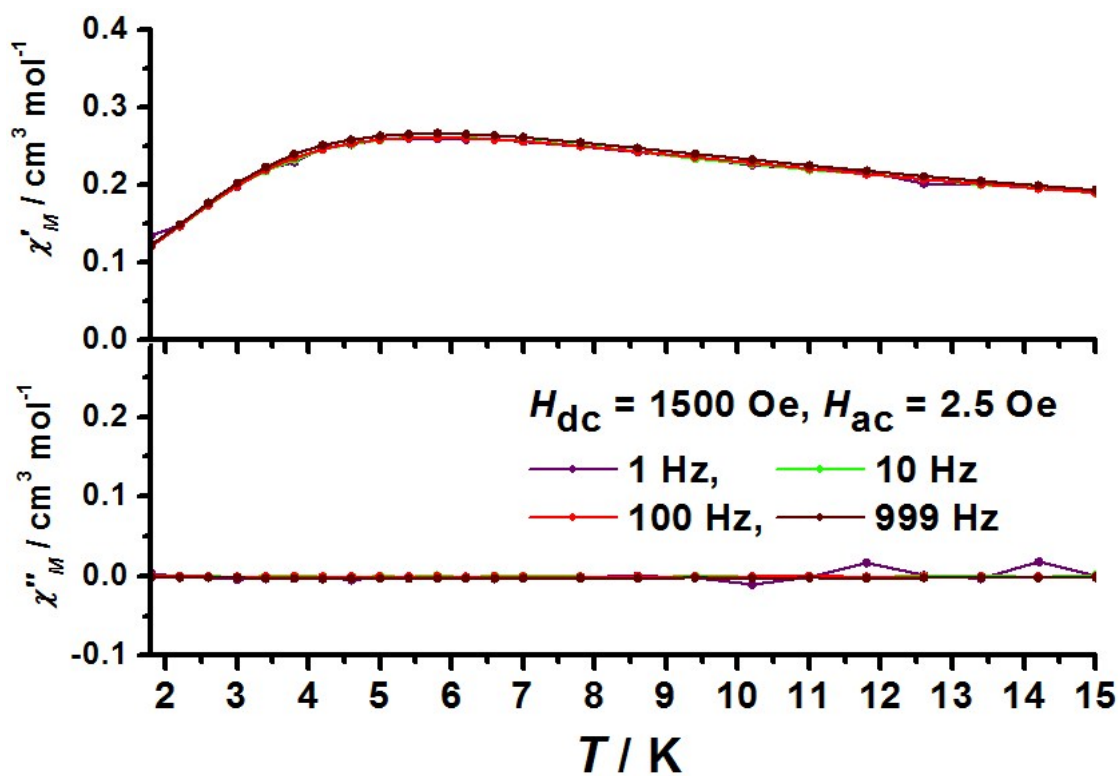

Fig. S4. Temperature dependence of the in-phase ( $\chi'_M$ ) and out-of-phase ( $\chi''_M$ ) AC magnetic susceptibilities at 1500 Oe dc field for 1. Lines are to guide the eyes.

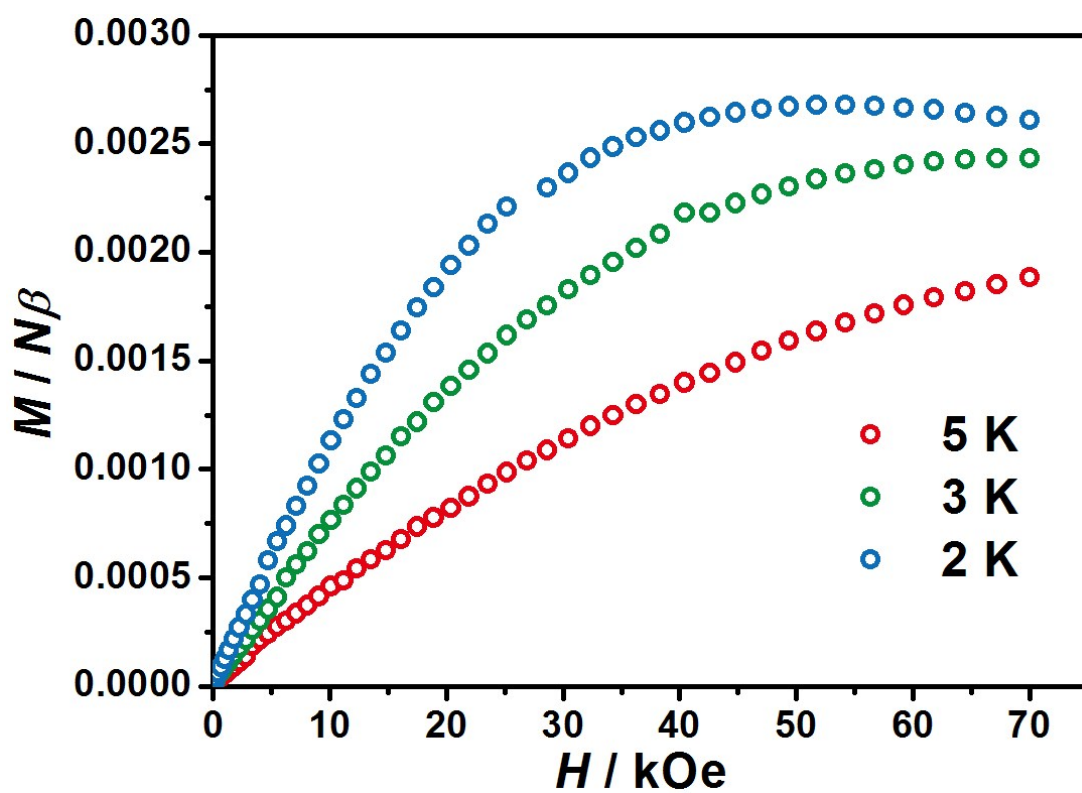

Fig. S5. Plots of  $M$ - $H$  for 4 at 2, 3 and 5 K. The solid lines are guides to the eyes.

Table S6. Comparison of cobalt, manganese and copper-based OER catalytic performance in neutral condition.

| Catalyst                                                              | potential at 2 mA cm <sup>-2</sup> (mV vs.RHE) | potential at 10 mA cm <sup>-2</sup> (mV vs.RHE) | <i>j</i> @1.8 V (mA cm <sup>-2</sup> ) | Reference                                    |
|-----------------------------------------------------------------------|------------------------------------------------|-------------------------------------------------|----------------------------------------|----------------------------------------------|
| [Co <sub>2</sub> (TPT) <sub>2</sub> (H <sub>2</sub> O) <sub>2</sub> ] | 1.86                                           | 2.00                                            | 0.67                                   | This work                                    |
| [Mn <sub>2</sub> (TPT) <sub>2</sub> (H <sub>2</sub> O) <sub>2</sub> ] | NA                                             | NA                                              | 0.14                                   | This work                                    |
| [Mn(TPT)(H <sub>2</sub> O) <sub>2</sub> ] <sub>n</sub>                | 2.09                                           | NA                                              | 0.30                                   | This work                                    |
| [Cu(TPT)] <sub>n</sub>                                                | 1.92                                           | 2.08                                            | 0.48                                   | This work                                    |
| Co <sub>3</sub> O <sub>4</sub>                                        | 1.89                                           | NA                                              | 0.61                                   | Adv. Funct. Mater. 2013, 23, 227-233         |
| CoPi                                                                  | 1.90                                           | NA                                              | 0.43                                   | Science 2008, 321, 1072-1075                 |
| ZIF-67@GC                                                             | 1.76                                           | NA                                              | 3.65                                   | J. Am. Chem. Soc. 2017, 139, 1778–1781       |
| MAF-X27-Cl                                                            | NA                                             | NA                                              | 0.028                                  | J. Am. Chem. Soc. 2016, 138, 8336–8339       |
| RuO <sub>2</sub>                                                      | 1.65                                           | NA                                              | 5.8                                    | Angew. Chem. Int. Ed. 10.1002/anie.201809144 |
| Mn <sub>3</sub> (PO <sub>4</sub> ) <sub>2</sub>                       | NA                                             | NA                                              | 0.05                                   | J. Am. Chem. Soc. 2014, 136, 7435–7443       |
| Mn <sub>2</sub> O <sub>3</sub>                                        | NA                                             | NA                                              | 0.025                                  | J. Am. Chem. Soc. 2014, 136, 7435–7443       |
| ([Cu <sub>2</sub> (TPMAN)(μ-OH)(H <sub>2</sub> O)] <sup>3+</sup> )    | NA                                             | NA                                              | 0.025                                  | Inorg. Chem. 2018, 57, 10481–10484           |
| [Cu <sub>2</sub> (BPMAN)(μ-OH)] <sup>3+</sup>                         | NA                                             | NA                                              | 0.05                                   | Angew. Chem., 2015, 127, 4991–4996           |
| Na <sub>2</sub> [Cu(opba)]                                            | 1.96                                           | NA                                              | 0.75                                   | RSC Adv., 2014, 4, 53674-53680               |

BPMAN=2,7-[bis(2-pyridylmethyl)aminomethyl]-1,8-naphthyridine; opba = o-phenylenebis(oxamato).
